# Supplementary material
Source: PubMed Central journal article supplement (PMC7646005)
Supplement: ADTS-3-2000185-s001.pdf [file ADTS-3-2000185-s001.pdf]

## Supporting Information

Gold Nanorod assisted enhanced plasmonic detection scheme of COVID-19 SARS-CoV-2 spike protein.

Chandreyee Manas Das, Yan Guo, Yang Guang, Lixing Kang, Gaixia Xu, Ho-Pui Ho and Ken-Tye Yong\*

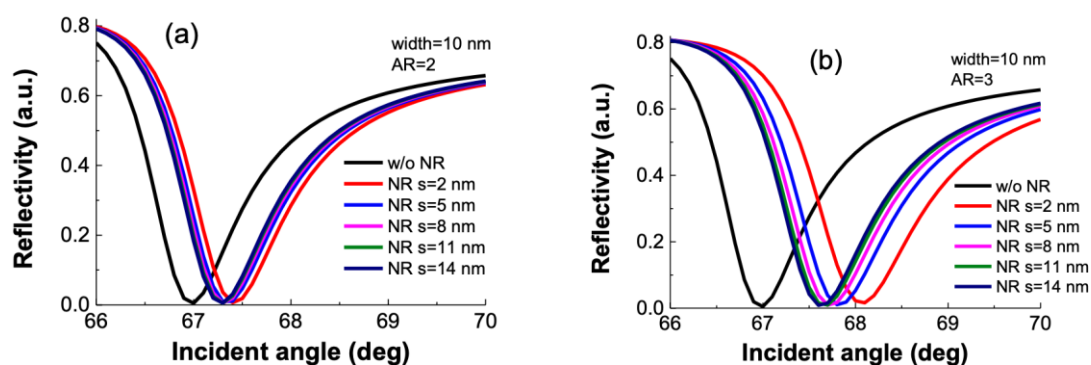

Figure S1. SPR reflectivity curves for Au nanosheet and Au NR system with varied spacing between NR and Au film when the aspect ratio equals to (a) 2 and (b) 3.

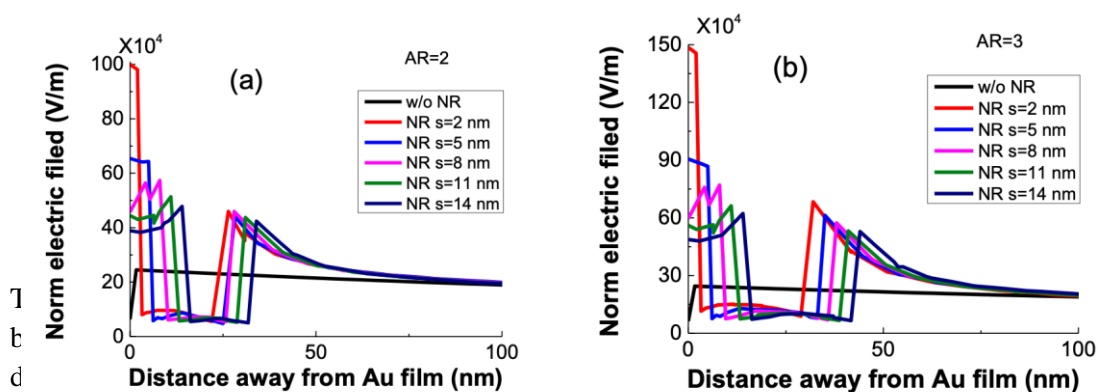

[10.1002/advs.202000162](https://doi.org/10.1002/advs.202000162)



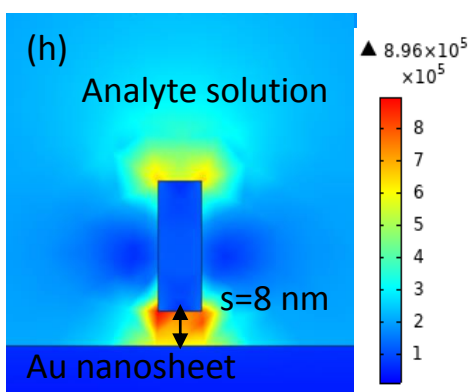

by copyri

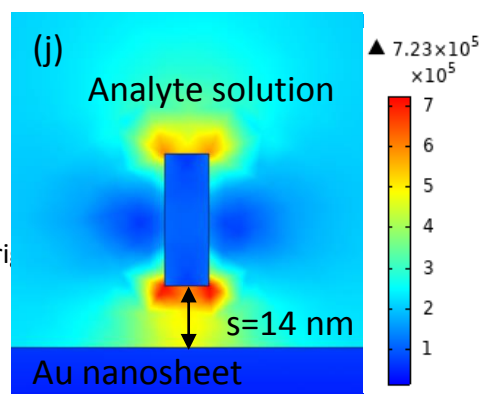

# Author Manuscript

**Figure S3.** Normal electric field distributions under the resonance condition for Au NR with different aspect ratios and located at various distances from the Au nanosheet for AR=2 (a-e) and AR=3 (f-j).
